1 **Title:** Neural coding of fine-grained object knowledge in perirhinal cortex  
2  
3

4 **Authors:** Amy Rose Price<sup>1,2</sup>, Michael F. Bonner<sup>1</sup>, Jonathan E. Peelle<sup>3</sup>, and Murray  
5 Grossman<sup>1,2</sup>  
6

7 <sup>1</sup>Center for Cognitive Neuroscience, University of Pennsylvania, Philadelphia, PA  
8 19104, USA

9 <sup>2</sup>Department of Neurology, University of Pennsylvania, Philadelphia, PA 19104, USA

10 <sup>3</sup>Department of Otolaryngology, Washington University in St. Louis, St. Louis, USA  
11  
12

13 **Corresponding author:**

14 Amy Rose Price

15 3400 Spruce St. – 2 Gibson

16 Philadelphia, PA 19104

17 amyroseprice@gmail.com  
18  
19

20 **Conflict of interest:** Nothing to declare  
21  
22  
23

24 **Summary:** Over 40 years of research has examined the role of the ventral visual  
25 stream in transforming retinal inputs into high-level representations of object identity [1-  
26 6]. However, there remains an ongoing debate over the role of the ventral stream in  
27 coding abstract semantic content, which relies on stored knowledge, versus perceptual  
28 content that relies only on retinal inputs [7-12]. A major difficulty in adjudicating between  
29 these mechanisms is that the semantic similarity of objects is often highly confounded  
30 with their perceptual similarity (e.g., animate things are more perceptually similar to  
31 other animate things than to inanimate things). To address this problem, we developed  
32 a paradigm that exploits the statistical regularities of object colors while perfectly  
33 controlling for perceptual shape information, allowing us to dissociate lower-level  
34 perceptual features (i.e., color perception) from higher-level semantic knowledge (i.e.,  
35 color meaning). Using multivoxel-pattern analyses of fMRI data, we observed a striking  
36 double dissociation between the processing of color information at a perceptual and at a  
37 semantic level along the posterior to anterior axis of the ventral visual pathway.  
38 Specifically, we found that the visual association region V4 assigned similar

1 representations to objects with similar colors, regardless of object category. In contrast,  
2 perirhinal cortex, at the apex of the ventral visual stream, assigned similar  
3 representations to semantically similar objects, even when this was in opposition to their  
4 perceptual similarity. These findings suggest that perirhinal cortex untangles the  
5 representational space of lower-level perceptual features and organizes visual objects  
6 according to their semantic interpretations.

7

8

9 **Keywords:** semantic memory; object representation; perirhinal cortex; high-level vision;  
10 representational similarity analysis

11

12

13 **Highlights:**

14 -Perirhinal cortex (PRc) contains combinatorial codes of object category and color

15 -These PRc codes reflect semantic knowledge of object colors

16 -V4 encodes color independent of semantic information

17 -These results reveal a transformation from perceptual to conceptual object codes

18

19

20 **In Brief:** Observers of the world know that roses are typically red and violets blue, but  
21 neurobiologists know little about how this knowledge is encoded by the brain. Price et  
22 al. report a neural mechanism through which humans understand the meaning of object  
23 colors, revealing a fundamental biological process that transforms sensory inputs into  
24 abstract representations of object meaning.

25

26

27 **Results and Discussion:**

28 We designed a novel stimulus set that allowed us to leverage the natural  
29 statistics of object-color information in order to investigate the perceptual and semantic  
30 coding of visual objects along the ventral stream. Many objects in our natural  
31 environment exist in a range of colors and exhibit clear statistical regularities in their

1 color appearance, which have important implications for their meaning (e.g., the color  
2 green has a different meaning for leaves than for bananas). The stimuli used in this  
3 study were images of objects from three categories (apples, leaves, and roses), which  
4 were displayed in five different colors (red, pink, yellow, green, and blue). Example  
5 stimuli are shown in Figure 1. The semantic associations of the colors differ in the  
6 context of each object category (e.g., green is a common natural color for leaves but not  
7 roses). Thus the color-and-object combinations give rise to a unique semantic similarity  
8 space for each category, and, importantly, these representational spaces differ from the  
9 perceptual similarity space of the colors alone. For example, in the category of apples,  
10 green is semantically similar to red (which are both common colors for apples), even  
11 though green and red are highly dissimilar in color-perceptual space. We used  
12 functional MRI (fMRI) in human participants to measure patterns of neural activity while  
13 the subjects viewed images of these objects and performed an unrelated visual-  
14 detection task (Supplementary Figure S1).  
15

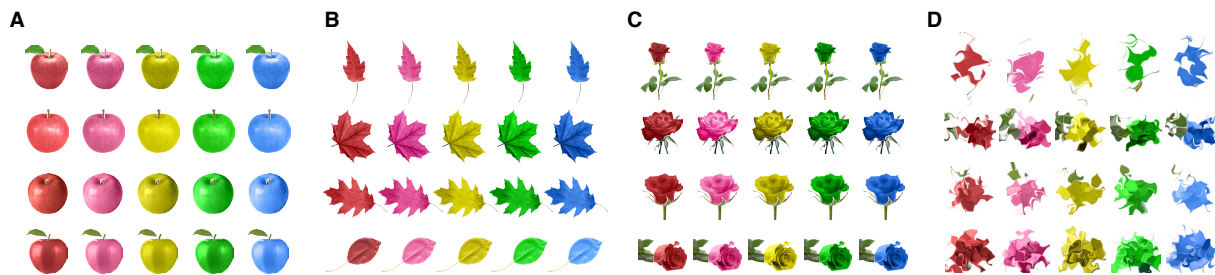

16  
17 **Figure 1.** Examples of stimuli from each object category in each color combination. (A)  
18 apples (B) leaves (C) roses (D) non-object diffeomorphically warped images.  
19  
20

21 We examined two theoretically motivated regions of interest along the ventral  
22 stream: V4 and perirhinal cortex (PRc). V4 is a mid-level association region that has  
23 previously been implicated in color perception [13-15], but whose possible role in color  
24 semantics remains unknown. PRc is a subregion of the anterior temporal lobe located at  
25 the apex of the ventral visual pathway [6] that has been implicated in object  
26 individuation and object semantics [16-24]. However, it is not yet known whether PRc

1 contains a mechanism for untangling the similarity space of lower-level perceptual  
2 inputs and organizing objects according to their semantic interpretations, even when  
3 this is at odds with their perceptual similarity.

4

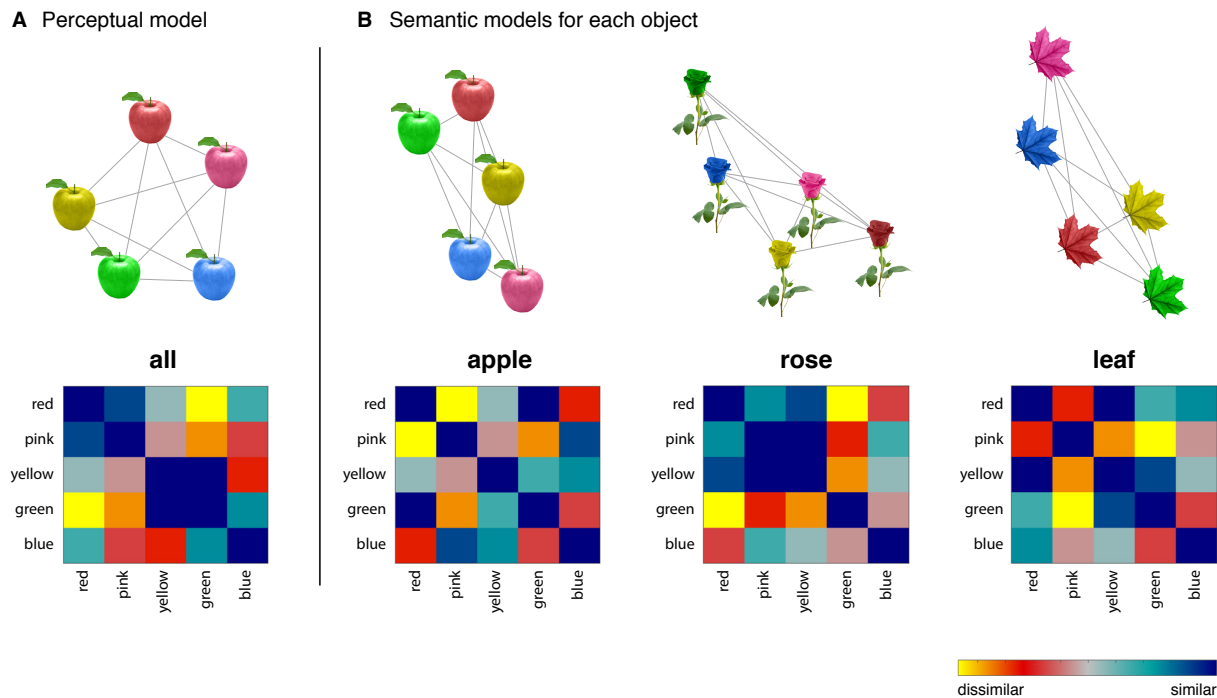

5 **Figure 2.** Representational dissimilarity models for the perceptual color model and the  
6 category-specific semantic models. Each plot shows a dissimilarity matrix on the bottom  
7 and a two-dimensional embedding of stimuli for that model on the top. (A) Perceptual-  
8 color model. This model is based on the perceptual similarity of the colors alone and is  
9 thus the same for all object categories. The apple category is shown as an example. (B)  
10 Semantic color models reflected category-specific co-occurrence statistics and thus are  
11 unique for each object category.  
12  
13

14

15 We used representational similarity analysis (RSA) to probe the information  
16 encoded in the multivariate activity patterns in our regions of interest. We specifically  
17 examined the fit of two models that capture the perceptual and semantic similarity of the  
18 colors within each category (Figure 2). A key aspect of this design is that we specifically  
19 modeled representational dissimilarities within each object category (e.g., roses). This  
20 approach perfectly controls for shape information, allowing us to examine the coding of

1 object semantics in a manner that is completely independent of perceptual confounds  
2 related to shape.

3 This analysis revealed a strong double dissociation between the perceptual  
4 representation of object colors in V4 and the semantic representation of object colors in  
5 PRc (Figure 3;  $2 \times 2$  repeated-measures ANOVA interaction of region by model,  $F(1,15)$   
6  $= 14.9$ ,  $p = 0.001$ ). As hypothesized, the semantic similarity model fit significantly in PRc  
7 but not V4 (V4:  $t(15) = 0.87$ ,  $p = 0.40$ , Cohen's  $d = 0.22$ ; PRc:  $t(15) = 5.41$ ,  $p < 0.001$ ,  
8 Cohen's  $d = 1.35$ ), whereas the perceptual color model fit significantly in V4 but not PRc  
9 (V4:  $t(15) = 2.22$ ,  $p = 0.04$ , Cohen's  $d = 0.56$ ; PRc:  $t(15) = 0.54$ ,  $p = 0.60$ , Cohen's  $d =$   
10  $0.13$ ). Furthermore, direct comparisons showed that the semantic similarity model fit  
11 significantly better in PRc than in V4 ( $t(15) = 3.87$ ,  $p = 0.002$ ; Cohen's  $d = 1.31$ ) and the  
12 perceptual similarity model fit significantly better in V4 than in PRc ( $t(15) = 2.13$ ,  $p =$   
13  $0.05$ ; Cohen's  $d = 0.67$ ).

14

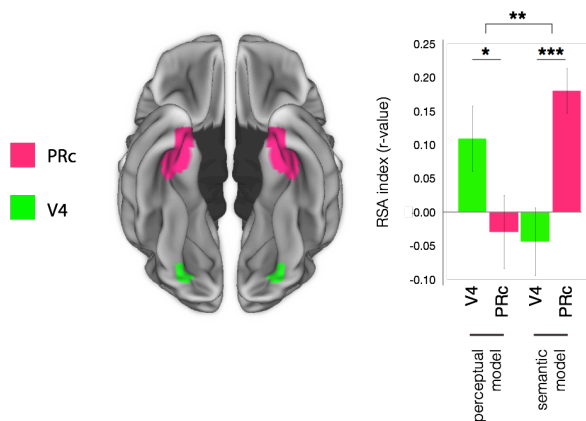

15

16 **Figure 3.** Double dissociation between the processing of color at a perceptual level in  
17 V4 and the processing of color at a semantic level in perirhinal cortex. \* $p < 0.05$ , \*\* $p <$   
18  $0.01$ , \*\*\* $p < 0.001$ . Bar plots depict means  $\pm$ SE

19

20

21 These findings indicate that PRc integrates the shape and color features of visual  
22 objects and links these perceptual inputs with knowledge representations of object  
23 colors. In doing so, PRc appears to embed visual object representations in a semantic  
24 space that is orthogonal to the lower-level perceptual similarity space of object features.  
25 These results are remarkably consistent with a previous neuropsychological report of a

1 patient with a lesion encompassing PRc who had a profound deficit in object-color  
2 knowledge but a relative sparing of color perception [25]. These findings are also  
3 broadly consistent with previous studies of the semantic variant of primary progressive  
4 aphasia (also known as semantic dementia), a neurodegenerative disease that  
5 encompasses PRc and results in a profound impairment in object meaning with a  
6 relative sparing of visual-perceptual abilities [26, 27]. Furthermore, the results of our  
7 color-perceptual model align well with recent work implicating V4 in the coding of a fine-  
8 grained perceptual color space [13, 28].

9 To test for possible effects in other regions of the ventral stream, we performed  
10 the same analyses in a series of regions along ventral occipital-temporal cortex  
11 (including early visual cortex, lateral occipital complex, inferior temporal gyrus, and  
12 fusiform gyrus). We found no significant effects in any other ventral visual regions for  
13 either the perceptual color model or the semantic model (Supplementary Figure S2B-C).  
14 We also performed an analysis to test for possible univariate effects related to the  
15 typicality of color-and-category combinations, which might reflect a coarse familiarity  
16 signal in PRc. We found no reliable correlation between color frequency and the mean  
17 univariate signal in either PRc or V4 (Supplementary Figure 3S).

18 Much of the work examining high-level semantic coding in the ventral visual  
19 stream has focused on the representation of broad categories of objects (e.g., animate  
20 versus inanimate; fruit versus vegetables). However, category membership is often  
21 highly correlated with basic shape information [9, 11, 12]. Furthermore, semantic  
22 representations of objects encompass much more than their broad category labels. An  
23 essential aspect of the semantic memory system is information about individual objects  
24 *within* a category. Here we were able examine the coding of fine-grained object  
25 semantics in a manner that completely controls for the contribution of perceptual shape  
26 information. Interestingly, we did not observe evidence for the coding of fine-grained  
27 object semantics in inferior temporal cortex, a region that is strongly associated with the  
28 representation of object categories but whose contribution to high-level object  
29 semantics has long been debated [7-12]. Rather this more fine-grained semantic  
30 information appears to be encoded in PRc—a higher-level region of the ventral stream  
31 that has previously been implicated in the detailed analysis that underlies object

1 individuation [17, 19-21, 29, 30]. Our findings are consistent with the proposed role of  
2 PRc in object individuation, but they suggest that the mechanism for object  
3 representation in PRc is more complex than a perceptual analysis of feature  
4 conjunctions. Specifically, these findings suggest that PRc not only disambiguates  
5 perceptually confusable objects (e.g., green apple and blue apple) but also assigns  
6 similar representations to perceptually distinct objects with similar meanings (e.g., green  
7 apple and red apple). Thus, PRc appears to untangle the similarity space of lower-level  
8 perceptual inputs and organize individual objects according to their semantic  
9 interpretations.

10

11

12 **Author contributions:** A.R.P, M.F.B, J.E.P, and M.G. designed the experiment,  
13 reviewed the analyses, and discussed the results. A.R.P. and M.F.B. collected the data  
14 and performed the analyses. A.R.P, M.F.B, J.E.P, and M.G. wrote the paper.

15

16

17 **Acknowledgements:** This work was supported by NIH grants R01 AG017586, the  
18 Wyncote Foundation, and the Jameson-Hurvich fund. The authors thank B. Stojanoski  
19 for sharing code for diffeomorphic transformations, and R. Epstein for helpful comments  
20 on this project.

1 **Experimental Procedures:**

2 Participants. Sixteen healthy participants (7 female; mean age = 24.6, SD = 2.6) with  
3 normal or corrected-to-normal vision were recruited from the University of Pennsylvania  
4 community. Participants provided written informed consent in compliance with  
5 procedures approved by the University of Pennsylvania Institutional Review Board.

6  
7 MRI acquisition. Participants were scanned on a Siemens 3.0 T Trio scanner. We  
8 acquired high-resolution T1-weighted structural images using an MPRAGE protocol (TR  
9 = 1620 ms, TE = 3.9 ms, flip angle = 15°, 1 mm slice thickness, 192 x 256 matrix, 160  
10 slices, resolution = 0.9766 x 0.9766 x 1 mm). There were 3 functional scanning runs  
11 using gradient echo EPI sequences (32 slices in descending order of 3 mm thickness, a  
12 between slice gap of 0.75 mm, a resolution of 3 x 3 x 3 mm, a matrix size of 64 x 64, a  
13 flip angle of 78°, a TR of 2 s, and a TE of 30 ms). Each functional run lasted  
14 approximately 15 minutes.

15  
16 Stimuli. Stimuli were colored objects presented on a phase-scrambled background.  
17 Three categories of objects (apples, leaves, and roses) were presented in five colors  
18 (red, pink, yellow, blue, and green). There was also a warped, non-object condition that  
19 was presented in the same five colors. Examples of stimuli from each condition are  
20 displayed in Figure 1. To create the stimuli, high-resolution images of natural objects  
21 were edited in Adobe Photoshop. The background was removed, leaving an object in  
22 isolation. The portion of the object containing the relevant color property was manually  
23 segmented and placed into a separate layer, where we were able to modify its color  
24 independent of the other object features (e.g., for an apple image, the body of the apple  
25 was segmented and its color was modified without altering the stem or the leaves). This  
26 segmented portion of the object was first set to grayscale. We then created colored  
27 versions of each object by modifying the RGB color settings for this grayscale  
28 segmentation to red (RGB: 121 18 21), pink (RGB: 222 103 147), yellow (RGB: 187 174  
29 30), blue (RGB: 0 67 166), and green (RGB: 0 171 0). Each object appeared in all five  
30 colors, ensuring that shape information was the same across all color conditions for a  
31 given object category. We repeated this procedure for 27 unique images within each



1 object category (i.e., 27 apples, 27 leaves, and 27 roses). The same procedure and  
2 color settings were used for all objects. We also created mirror-flipped versions of the  
3 colored objects, resulting in 54 unique stimuli for each color-object condition (producing  
4 a total of 810 unique object stimuli). We created non-object images by applying a  
5 diffeomorphic warping procedure to the object stimuli described above. This procedure  
6 involves a smooth and continuous image transformation applied iteratively (40 iterations  
7 were used), and preserves low-level perceptual properties of the stimuli while making  
8 them unrecognizable as real-world objects [31]. All objects and non-object stimuli were  
9 centrally placed over a grayscale phase-scrambled background (the same background  
10 was used for all images).

11  
12 Stimulus presentation. We presented 810 unique object images to participants while  
13 collecting fMRI data from 15 categories of color-and-object combinations (Figure 1).  
14 Stimuli were presented in an event-related design using a continuous carry-over  
15 sequence within each run [32]. In each of the three runs, subjects viewed 270 unique  
16 object images (18 unique examples x 15 color-object conditions), as well as 36 unique  
17 non-object images. There were also 18 null events (5 s) in each run (null events were  
18 treated as an additional condition in the continuous carryover design) [32]. Each  
19 stimulus was presented on the screen for 1 s with an inter-stimulus interval of 1.5 s. On  
20 each trial subjects indicated by button press whether the image was an object or a non-  
21 object foil (Supplementary Figure S1). Therefore, subjects responded yes to all object  
22 images, regardless of typicality or category, and no to the non-object foils. Task  
23 accuracy was high. For object images the mean accuracy was 99.9% (SD = 0.1%), and  
24 for non-object images the mean accuracy was 96.4% (SD = 3.7%).

25  
26 Regions of interest. We defined a series of bilateral regions of interest (ROI) along the  
27 ventral visual pathway. These included ROIs for early visual cortex (EVC), V4, lateral  
28 occipital complex (LOC), inferior temporal gyrus (ITG), fusiform gyrus (FG), and  
29 perirhinal cortex (PRc). The ITG and FG ROIs were taken from the AAL atlas [33]. The  
30 EVC and LOC ROIs were taken from probabilistically defined parcels of functional  
31 localizer contrasts from a large number of subjects in a separate experiment (shared by

1 the Epstein lab and described here [34]). These parcels were created through an  
2 automated procedure that identifies clusters of common activation across individuals for  
3 a series of functional ROI contrasts [35]. The LOC parcel was created from a contrast of  
4 objects > scrambled images, and the EVC parcel was created from a contrast of  
5 scrambled images > objects. We used the entire parcels for both EVC and LOC, and we  
6 did not apply any further voxel-selection procedures to these ROIs. Our V4 ROI was  
7 created by placing spheres with a 6-mm radius around MNI coordinates that were  
8 reported in a classic study of color-perceptual processing [15], and which have  
9 previously been used to define ROIs for color processing [36]. The perirhinal cortex ROI  
10 was taken from a probabilistic map of anatomic segmentations [37] and was threshold  
11 to include voxels with at least 30% overlap across subjects.

12  
13 *fMRI preprocessing and modeling.* The fMRI data were processed and modeled using  
14 SPM8 (Wellcome Trust Centre for Neuroimaging, London, UK) and MATLAB (R2014a  
15 Mathworks; The MathWorks, Natick, MA). For each participant, all functional images  
16 were realigned to the first image [38] and co-registered to the structural image [39]. The  
17 images were spatially smoothed using a 3 mm FWHM isotropic Gaussian kernel. We  
18 modeled voxel responses to all conditions in each run in a single general linear model.  
19 Low-frequency drifts were removed using a high-pass filter with a cutoff period of 128  
20 sec, and auto-correlations were modeled with a first-order autoregressive model. The  
21 parameter estimates for each condition were then averaged across runs. The resulting  
22 images were whole-brain maps of the voxel responses to each condition, which we then  
23 normalized to standard Montreal Neurological Institute space using a unified  
24 segmentation approach [40]. We used these maps to characterize the multivoxel  
25 information content in a series of ROIs through representational similarity analysis [41].

26  
27 *Representational similarity analysis.* We used representational similarity analysis (RSA)  
28 [41] to characterize the information encoded in the population responses of ROIs  
29 throughout the ventral visual pathway. For each ROI we constructed neural  
30 representational dissimilarity matrices (RDM) that represented all pairwise comparisons  
31 of conditions within each object category. The responses within each voxel were first z-

1 scored across conditions, and we then computed neural dissimilarity as one minus the  
2 Pearson correlation coefficient between the multivoxel activation patterns for each  
3 condition. We also constructed dissimilarity matrices that represented the distances  
4 between conditions based on two models of representational content. The specifics of  
5 these two models are discussed below. We tested how well each model accounted for  
6 the representational structure in an ROI by calculating the Spearman correlation  
7 between the model and the neural dissimilarity matrices. The significance of each model  
8 was assessed using random-effects t-tests of the RSA correlations across subjects.

9 We examined two key models to test for the coding of a perceptual color space  
10 and a semantic color space. The perceptual model was created from subjective  
11 evaluations of color similarity collected in a norming study (described below). This  
12 model reflects the perceptual similarity of the colors independent of the object  
13 categories, and it was thus the same for each object category (e.g., red is more similar  
14 to pink than to green; Figure 2A). We converted these data into a dissimilarity matrix by  
15 taking the negative of the pairwise similarity values. The semantic model represents the  
16 dissimilarities between colors within each object category (e.g., red apple is more  
17 similar to green apple than to pink apple). Because the semantic statistics were unique  
18 to each object category, these models differed across categories (Figure 2B). Model fits  
19 were computed for each category separately, and we calculated the mean fit across  
20 categories. An important strength of this design is that all dissimilarity measurements  
21 reflect comparisons within an object category (i.e., apples, leaves, and roses), which  
22 means that the stimuli in each comparison contain the same shape information and only  
23 differ on color. This completely controls for shape information in both the perceptual and  
24 the semantic color models.

25

26 *Perceptual color model.* We constructed a model of perceptual color similarity using  
27 subjective evaluations collected in a separate norming survey (N=18). This model  
28 captures color similarity independent of object categories. We presented the subjects  
29 with colored squares using the same RGB values used for the colored object images.  
30 Subjects judged the color similarity of the color swatches in a forced-choice two-  
31 alternative task with a reference swatch shown at the top and two choice swatches

1 shown below. In an example trial, a subject might be shown a pink square at the top of  
2 the screen and asked to judge which of the two squares on the bottom, a red square or  
3 a blue square, is more similar. We constructed all possible pairings of reference and  
4 choice swatches (30 triads total), resulting in an equal number of judgments for all  
5 pairwise comparisons of colors. We used these data to construct a similarity matrix. For  
6 each pairwise comparison in this matrix, we counted the number of times that subjects  
7 reported those two colors as similar across all trials of the similarity judgment task. In  
8 other words, we filled the cells of this matrix with frequency counts of similarity pairings.  
9 We then converted this into a dissimilarity matrix by taking the negative of the similarity  
10 values. The resulting matrix captures color relationships that are closely matched to the  
11 perceptual space of a color wheel, as can be seen in the two-dimensional embedding in  
12 Figure 2A (all visualizations of two-dimensional embeddings were generated using t-  
13 distributed stochastic neighbor embedding [42]).

14  
15 *Semantic color model.* We constructed a model of semantic color similarity based on  
16 the feature co-occurrence frequencies for the colors and object categories. This model  
17 reflects color similarity relationships that are unique to each object category (e.g., green  
18 apples are more similar to red apples than to blue apples based on how frequently  
19 apples occur in these colors). We used a metric of co-occurrence frequency that  
20 captures the statistics of how people talk about object colors in written text [43]. This  
21 metric is derived from billions of words of text, and we reasoned that it would be strongly  
22 tied to how people think about and interpret these objects in the natural environment.  
23 We measured co-occurrence frequencies using Google ngram, a large corpus of  
24 English-language books [44]. Specifically, we quantified the directional co-occurrence  
25 frequencies of the color and object terms using both the singular and plural forms of the  
26 object terms (e.g., “red apple” and “red apples”) from 2008 (the most recent available  
27 data). We used log-transformed values of the co-occurrence statistics. To verify that  
28 these co-occurrence statistics related to the semantic interpretation of the objects, we  
29 asked the participants from the fMRI experiment to complete a series of subjective  
30 typicality ratings for the object images at the end of the study. The ratings were made  
31 on a 1-to-7 scale of highly atypical to highly typical. We were specifically interested in

1 assessing whether subjects' intuitions about color typicality related to the co-occurrence  
2 statistics of the object and color terms (e.g., that the high co-occurrence of "red apple" in  
3 text corresponded to subjective ratings that this color and object combination was highly  
4 typical). Indeed, there was a strong correlation between the co-occurrence statistics and  
5 mean subjective ratings of typicality across all objects ( $r = 0.71$ ,  $p = 0.001$ ). These co-  
6 occurrence statistics were then used to construct a model dissimilarity matrix of the  
7 semantic color space for each object category. We calculated the relative difference in  
8 co-occurrence for all pairwise comparisons of objects within a category (i.e., the  
9 absolute difference divided by the sum of the co-occurrence statistics). These  
10 dissimilarity matrices capture a model in which highly typical colors for an object  
11 category are close together in representational space, as can be seen in the two-  
12 dimensional embedding in Figure 2B [42].

13

14

## 15 **References**

- 16 1. Mishkin, M. (1972). Cortical Visual Areas and Their Interactions. In *Brain and*  
17 *Human Behavior*, A.G. Karczmar and J.C. Eccles, eds. (Berlin, Heidelberg:  
18 Springer Berlin Heidelberg), pp. 187-208.
- 19 2. Ungerleider, L.G., Mishkin, M., Ingle, D.J., Goodale, M.A., and Mansfield, R.J.W.  
20 (1982). Two cortical visual systems. In *Analysis of visual behavior*. (Cambridge:  
21 MIT Press), pp. 549-580.
- 22 3. Felleman, D.J., and Van Essen, D.C. (1991). Distributed hierarchical processing  
23 in the primate cerebral cortex. *Cereb. Cortex* *1*, 1-47.
- 24 4. Goodale, M.A., Meenan, J.P., Bulthoff, H.H., Nicolle, D.A., Murphy, K.J., and  
25 Racicot, C.I. (1994). Separate neural pathways for the visual analysis of object  
26 shape in perception and prehension. *Curr. Biol.* *4*, 604-610.
- 27 5. DiCarlo, J.J., Zoccolan, D., and Rust, N.C. (2012). How Does the Brain Solve  
28 Visual Object Recognition? *Neuron* *73*, 415-434.
- 29 6. Kravitz, D.J., Saleem, K.S., Baker, C.I., Ungerleider, L.G., and Mishkin, M.  
30 (2013). The ventral visual pathway: An expanded neural framework for the  
31 processing of object quality. *Trends in Cognitive Sciences* *17*, 26-49.
- 32 7. Kriegeskorte, N., Mur, M., Ruff, D.A., Kiani, R., Bodurka, J., Esteky, H., Tanaka,  
33 K., and Bandettini, P.A. (2008). Matching Categorical Object Representations in  
34 Inferior Temporal Cortex of Man and Monkey. *Neuron* *60*, 1126-1141.
- 35 8. Connolly, A.C., Guntupalli, J.S., Gors, J., Hanke, M., Halchenko, Y.O., Wu, Y.C.,  
36 Abdi, H., and Haxby, J.V. (2012). The representation of biological classes in the  
37 human brain. *J. Neurosci.* *32*, 2608-2618.

- 1 9. Baldassi, C., Alemi-Neissi, A., Pagan, M., Dicarlo, J.J., Zecchina, R., and  
2 Zoccolan, D. (2013). Shape similarity, better than semantic membership,  
3 accounts for the structure of visual object representations in a population of  
4 monkey inferotemporal neurons. *PLoS computational biology* *9*, e1003167.
- 5 10. Khaligh-Razavi, S.-M., and Kriegeskorte, N. (2014). Deep Supervised, but Not  
6 Unsupervised, Models May Explain IT Cortical Representation. *PLoS Comput*  
7 *Biol* *10*, e1003915.
- 8 11. Rice, G.E., Watson, D.M., Hartley, T., and Andrews, T.J. (2014). Low-level image  
9 properties of visual objects predict patterns of neural response across category-  
10 selective regions of the ventral visual pathway. *J. Neurosci.* *34*, 8837-8844.
- 11 12. Bracci, S., and Op de Beeck, H. (2016). Dissociations and Associations between  
12 Shape and Category Representations in the Two Visual Pathways. *J. Neurosci.*  
13 *36*, 432-444.
- 14 13. Brouwer, G.J., and Heeger, D.J. (2011). Cross-orientation suppression in human  
15 visual cortex. *J. Neurophysiol.* *106*, 2108-2119.
- 16 14. Brouwer, G.J., and Heeger, D.J. (2009). Decoding and Reconstructing Color from  
17 Responses in Human Visual Cortex. *J. Neurosci.* *29*, 13992-14003.
- 18 15. McKeefry, D.J., and Zeki, S. (1997). The position and topography of the human  
19 colour centre as revealed by functional magnetic resonance imaging. *Brain* *120* (  
20 *Pt 12*), 2229-2242.
- 21 16. Tyler, L.K., Stamatakis, E.A., Bright, P., Acres, K., Abdallah, S., Rodd, J., and  
22 Moss, H. (2004). Processing objects at different levels of specificity. *J. Cogn.*  
23 *Neurosci.* *16*, 351-362.
- 24 17. Clarke, A., and Tyler, L.K. (2014). Object-specific semantic coding in human  
25 perirhinal cortex. *J. Neurosci.* *34*, 4766-4775.
- 26 18. Murray, E.A., and Richmond, B.J. (2001). Role of perirhinal cortex in object  
27 perception, memory, and associations. *Curr. Opin. Neurobiol.* *11*, 188-193.
- 28 19. Bussey, T.J., Saksida, L.M., and Murray, E.A. (2002). Perirhinal cortex resolves  
29 feature ambiguity in complex visual discriminations. *Eur. J. Neurosci.* *15*, 365-  
30 374.
- 31 20. Murray, E.A., and Bussey, T.J. (1999). Perceptual-mnemonic functions of the  
32 perirhinal cortex. *Trends in cognitive sciences* *3*, 142-151.
- 33 21. Bussey, T.J., Saksida, L.M., and Murray, E.A. (2003). Impairments in visual  
34 discrimination after perirhinal cortex lesions: testing 'declarative' vs. 'perceptual-  
35 mnemonic' view of perirhinal cortex function. *Eur. Neurosci.* *17*, 649.
- 36 22. Barense, M.D., Bussey, T.J., Lee, A.C.H., Rogers, T.T., Davies, R.R., Saksida,  
37 L.M., Murray, E.A., and Graham, K.S. (2005). Functional specialization in the  
38 human medial temporal lobe. *J. Neurosci.* *25*, 10239-10246.
- 39 23. Barense, M.D., Henson, R.N., and Graham, K.S. (2011). Perception and  
40 conception: temporal lobe activity during complex discriminations of familiar and  
41 novel faces and objects. *J. Cogn. Neurosci.* *23*, 3052-3067.
- 42 24. Clarke, A., and Tyler, L.K. (2015). Understanding What We See: How We Derive  
43 Meaning From Vision. *Trends Cogn Sci* *19*, 677-687.



- 1 25. Miceli, G., Fouch, E., Capasso, R., Shelton, J.R., Tomaiuolo, F., and Caramazza,  
2 A. (2001). The dissociation of color from form and function knowledge. *Nature*  
3 *neuroscience* 4, 662-667.
- 4 26. Davies, R.R., Graham, K.S., Xuereb, J.H., Williams, G.B., and Hodges, J.R.  
5 (2004). The human perirhinal cortex and semantic memory. *Eur. J. Neurosci.* 20,  
6 2441-2446.
- 7 27. Patterson, K., Nestor, P., and Rogers, T. (2007). Where do you know what you  
8 know? The representation of semantic knowledge in the human brain. *Nat. Rev.*  
9 *Neurosci.* 8, 976-987.
- 10 28. Brouwer, G.J., and Heeger, D.J. (2009). Decoding and reconstructing color from  
11 responses in human visual cortex. *J. Neurosci.* 29, 13992-14003.
- 12 29. Devlin, J.T., and Price, C.J. (2007). Perirhinal contributions to human visual  
13 perception. *Current biology : CB* 17, 1484-1488.
- 14 30. Tyler, L.K. (2004). Processing objects at different levels of specificity. *J. Cog.*  
15 *Neurosci.* 16, 351-362.
- 16 31. Stojanoski, B., and Cusack, R. (2014). Time to wave good-bye to phase  
17 scrambling: creating controlled scrambled images using diffeomorphic  
18 transformations. *Journal of vision* 14.
- 19 32. Aguirre, G.K. (2007). Continuous carry-over designs for fMRI. *Neuroimage* 35,  
20 1480-1494.
- 21 33. Tzourio-Mazoyer, N., Landeau, B., Papathanassiou, D., Crivello, F., Etard, O.,  
22 Delcroix, N., Mazoyer, B., and Joliot, M. (2002). Automated Anatomical Labeling  
23 of Activations in SPM Using a Macroscopic Anatomical Parcellation of the MNI  
24 MRI Single-Subject Brain. *Neuroimage* 15, 273-289.
- 25 34. Marchette, S.A., Vass, L.K., Ryan, J., and Epstein, R.A. (2014). Anchoring the  
26 neural compass: coding of local spatial reference frames in human medial  
27 parietal lobe. *Nature neuroscience* 17, 1598-1606.
- 28 35. Julian, J.B., Fedorenko, E., Webster, J., and Kanwisher, N. (2012). An  
29 algorithmic method for functionally defining regions of interest in the ventral visual  
30 pathway. *Neuroimage* 60, 2357-2364.
- 31 36. Coutanche, M.N., and Thompson-Schill, S.L. (2015). Creating Concepts from  
32 Converging Features in Human Cortex. *Cereb Cortex* 25, 2584-2593.
- 33 37. Holdstock, J.S., Hocking, J., Notley, P., Devlin, J.T., and Price, C.J. (2009).  
34 Integrating visual and tactile information in the perirhinal cortex. *Cereb Cortex* 19,  
35 2993-3000.
- 36 38. Friston, K.J., Ashburner, J., Frith, C.D., Poline, J.B., Heather, J.D., and  
37 Frackowiak, R.S.J. (1995). Spatial registration and normalization of images.  
38 *Hum. Brain Mapp.* 3, 165-189.
- 39 39. Ashburner, J., and Friston, K. (1997). Multimodal Image Coregistration and  
40 Partitioning--A Unified Framework. *Neuroimage* 6, 209-217.
- 41 40. Ashburner, J., and Friston, K.J. (2005). Unified segmentation. *Neuroimage* 26,  
42 839-851.
- 43 41. Kriegeskorte, N., and Kievit, R.A. (2013). Representational geometry: integrating  
44 cognition, computation, and the brain. *Trends Cogn Sci* 17, 401-412.

- 1 42. Maaten, L.V.D., and Hinton, G. (2008). Visualizing data using t-SNE. *Journal of*  
2 *Machine Learning Research* 9, 2579-2605
- 3 43. Price, A.R., Bonner, M.F., Peelle, J.E., and Grossman, M. (2015). Converging  
4 evidence for the neuroanatomic basis of combinatorial semantics in the angular  
5 gyrus. *J. Neurosci.* 35, 3276-3284.
- 6 44. Michel, J.B., Shen, Y.K., Aiden, A.P., Veres, A., Gray, M.K., Google Books, T.,  
7 Pickett, J.P., Hoiberg, D., Clancy, D., Norvig, P., et al. (2011). Quantitative  
8 analysis of culture using millions of digitized books. *Science* 331, 176-182.

9  
10  
11  
12  
13  
14

## 15 **Figure Legends**

16  
17  
18  
19  
20

**Figure 1.** Example stimuli from each object category in each color combination. (A) apples (B) leaves (C) roses (D) non-object diffeomorphically warped images

21  
22  
23  
24  
25  
26  
27  
28  
29

**Figure 2.** Representational dissimilarity models for the perceptual color model and the category-specific semantic models. Each plot shows a dissimilarity matrix on the bottom and a two-dimensional embedding of stimuli for that model on the top. (A) Perceptual-color model. This model is based on the perceptual similarity of the colors alone and is thus the same for all object categories. The apple category is shown as an example. (B) Semantic color models reflected category-specific co-occurrence statistics and thus are unique for each object category.

30  
31  
32  
33

**Figure 3.** Double dissociation between the processing of color at a perceptual level in V4 and the processing of color at a semantic level in perirhinal cortex. \* $p < 0.05$ , \*\* $p < 0.01$ , \*\*\* $p < 0.001$ . Plots depict correlation means  $\pm$ SE

34  
35  
36



1 **Supplemental Information:**

2

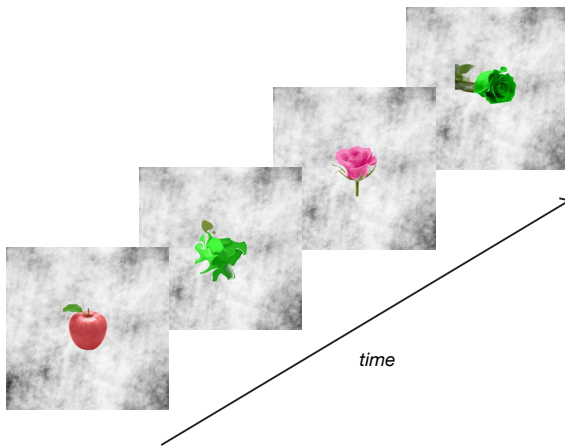

3

4 **Supplementary Figure S1.** Visual-object behavioral task. Related to Figures 1 and 2.  
5 On each trial, participants viewed a single image on a phase-scrambled background  
6 and had to decide whether it was an object image or a warped non-object image.

7

8

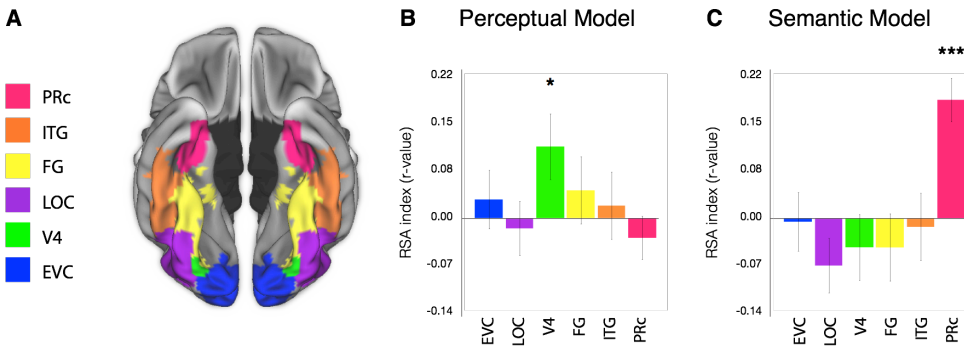

9

10 **Supplementary Figure S2.** Representations of perceptual-color similarity and  
11 semantic-color similarity along the ventral visual stream. Related to Figure 3. To test for  
12 possible effects in other regions of the ventral stream, we performed the same analyses  
13 in a series of regions along ventral occipital-temporal cortex. (A) Color-coded regions of  
14 interest (B) Results for the perceptual-color model. The only region to show an effect for  
15 this model was V4 ( $p = 0.02$ ). EVC:  $t(15) = 0.69$ ,  $p = 0.50$ ; LOC:  $t(15) = 0.33$ ,  $p = 0.75$ ;  
16 ITG:  $t(15) = 0.46$ ,  $p = 0.65$ ; FG:  $t(15) = 1.14$ ,  $p = 0.27$ . (C) Results for the semantic  
17 model. The only region to show an effect for the semantic model was perirhinal cortex  
18 ( $p < 0.001$ ). EVC:  $t(15) = 0.11$ ,  $p = 0.91$ ; LOC:  $t(15) = 1.71$ ,  $p = 0.11$ ; ITG:  $t(15) = 0.25$ ,  $p$   
19  $= 0.81$ ; FG:  $t(15) = 0.86$ ,  $p = 0.40$ ). Bar plots depict means  $\pm$ SE. EVC = early visual  
20 cortex, LOC = lateral occipital complex, FG = fusiform gyrus, ITG = inferior temporal  
21 gyrus, PRC = perirhinal cortex. \* $p < 0.05$ , \*\*\* $p < 0.001$

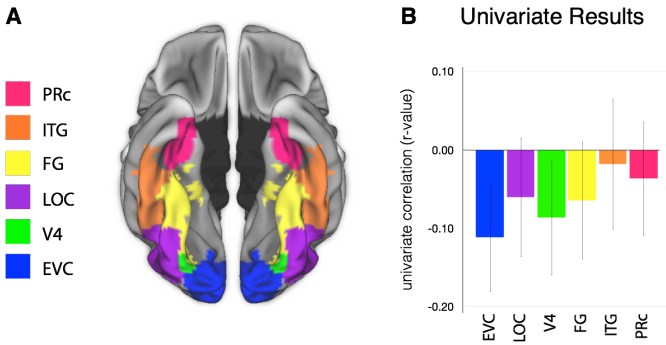

1  
2 **Supplementary Figure S3.** Summary of results from univariate analysis in all regions.  
3 Related to Figure 3. This analysis examined possible correlations between the typicality  
4 of color-and-category combinations and univariate activation, which might reflect a  
5 coarse familiarity signal within each object category. We calculated the correlation  
6 between the mean activity of each ROI and the log n-gram frequency of the color and  
7 object combinations. The correlation was calculated across all conditions after mean-  
8 centering the data within each object category (in order partial out overall differences  
9 across object categories and specifically examine the within-category effects of color  
10 typicality). Significance was assessed using random-effects t-tests of the univariate  
11 correlations across subjects. (A) Color-coded regions of interest. (B) We found no  
12 reliable correlation between color frequency and univariate signal in either PRc or V4 or  
13 in any of the other ventral visual regions of interest. (EVC ( $t(15) = 1.61$ ,  $p = 0.13$ ); LOC  
14 ( $t(15) = 0.80$ ,  $p = 0.44$ ); V4:  $t(15) = 1.18$ ,  $p = 0.26$ ; ITG ( $t(15) = 0.22$ ,  $p = 0.83$ ); FG ( $t(15)$   
15  $= 0.86$ ,  $p = 0.40$ ) PRc:  $t(15) = 0.50$ ,  $p = 0.62$ ). Bar plots depict means  $\pm$ SE. EVC = early  
16 visual cortex, LOC = lateral occipital complex, FG = fusiform gyrus, ITG = inferior  
17 temporal gyrus, PRc = perirhinal cortex.
